**S1 Table.** Distribution of responses (%) in each item of the mental wellbeing questionnaire.

| Question/responses |                                                    |        | Mean ±SD   | % of responses (Q1-Q7) |        |           |       |           | % of responses (total score) |        |       |
|--------------------|----------------------------------------------------|--------|------------|------------------------|--------|-----------|-------|-----------|------------------------------|--------|-------|
| Num                | Text                                               | Time   |            | Never                  | Rarely | Sometimes | Often | All times | Low                          | Medium | High  |
| Q1                 | I've been feeling optimistic about the future      | Before | 4.08±0.91  | 1.7%                   | 3.6%   | 17.0%     | 40.7% | 37.0%     | N/A                          |        |       |
|                    |                                                    | During | 3.54±1.11  | 4.9%                   | 11.1%  | 32.7%     | 28.3% | 23.1%     |                              |        |       |
| Q2                 | I've been feeling useful                           | Before | 4.05±0.89  | 1.7%                   | 3.2%   | 17.5%     | 44.0% | 33.6%     |                              |        |       |
|                    |                                                    | During | 3.62±1.13  | 5.4%                   | 10.7%  | 26.1%     | 32.5% | 25.3%     |                              |        |       |
| Q3                 | I've been feeling relaxed                          | Before | 3.38±0.94  | 3.4%                   | 11.5%  | 38.9%     | 35.7% | 10.5%     |                              |        |       |
|                    |                                                    | During | 3.25±1.07  | 6.5%                   | 16.1%  | 35.2%     | 29.9% | 12.2%     |                              |        |       |
| Q4                 | I've been dealing with Problems well               | Before | 3.88±0.81  | 1.2%                   | 3.4%   | 21.6%     | 53.5% | 20.2%     |                              |        |       |
|                    |                                                    | During | 3.62±0.93  | 2.3%                   | 8.1%   | 31.1%     | 41.9% | 16.5%     |                              |        |       |
| Q5                 | I've been thinking clearly                         | Before | 3.99±0.77  | 0.7%                   | 3.1%   | 17.2%     | 55.0% | 24.1%     |                              |        |       |
|                    |                                                    | During | 3.71±0.94  | 2.1%                   | 7.8%   | 26.7%     | 43.6% | 19.8%     |                              |        |       |
| Q6                 | I've been feeling close to other people            | Before | 3.88±0.92  | 1.6%                   | 5.3%   | 23.3%     | 43.4% | 26.5%     |                              |        |       |
|                    |                                                    | During | 3.26±1.16  | 7.8%                   | 17.7%  | 30.8%     | 27.7% | 16.0%     |                              |        |       |
| Q7                 | I've been able to make up my own mind about things | Before | 4.04±0.83  | 1.1%                   | 3.2%   | 15.9%     | 50.0% | 29.9%     |                              |        |       |
|                    |                                                    | During | 3.72±1     | 3.0%                   | 8.1%   | 25.6%     | 40.1% | 23.2%     |                              |        |       |
| Total Score        |                                                    | Before | 27.3±4.37  | N/A                    |        |           |       |           | 5.6%                         | 43.1%  | 51.4% |
|                    |                                                    | During | 24.73±5.18 |                        |        |           |       |           | 18.5%                        | 51.4%  | 30.2% |
