# Supplementary material for: Psychological consequences of COVID-19 home confinement: The ECLB-COVID19 multicenter study
Source: PLOS journal article supplement (doi:10.1371/journal.pone.0240204), 2020-11-05
Supplement: S3 (10.1371/journal.pone.0240204.s003) [file journal.pone.0240204.s003]

**S2 Table.** Distribution of responses (%) in each item of the mood and feeling questionnaire.

| Question/responses |                                                    |        | Mean ± SD | % of responses (Q1-Q13) |           |       | % of responses (total score) |                       |
|--------------------|----------------------------------------------------|--------|-----------|-------------------------|-----------|-------|------------------------------|-----------------------|
| Num                | Text                                               | Time   |           | Not true                | Sometimes | True  | Presence of depression       | Absence of depression |
| Q1                 | I felt miserable or unhappy                        | Before | 0.49±0.57 | 55.0%                   | 41.3%     | 3.7%  | N/A                          |                       |
|                    |                                                    | During | 0.79±0.72 | 38.7%                   | 44.1%     | 17.2% |                              |                       |
| Q2                 | I didn't enjoy anything at all                     | Before | 0.29±0.51 | 73.9%                   | 23.5%     | 2.6%  |                              |                       |
|                    |                                                    | During | 0.6±0.7   | 52.8%                   | 34.9%     | 12.3% |                              |                       |
| Q3                 | I felt so tired I just sat around and did nothing  | Before | 0.46±0.6  | 59.8%                   | 34.7%     | 5.5%  |                              |                       |
|                    |                                                    | During | 0.81±0.78 | 41.9%                   | 35.5%     | 22.5% |                              |                       |
| Q4                 | I was very restless                                | Before | 0.46±0.6  | 59.9%                   | 34.4%     | 5.7%  |                              |                       |
|                    |                                                    | During | 0.66±0.75 | 50.5%                   | 33.0%     | 16.5% |                              |                       |
| Q5                 | I felt I was no good anymore                       | Before | 0.34±0.53 | 68.6%                   | 28.7%     | 2.8%  |                              |                       |
|                    |                                                    | During | 0.55±0.71 | 57.2%                   | 30.1%     | 12.7% |                              |                       |
| Q6                 | I cried a lot                                      | Before | 0.39±0.6  | 67.2%                   | 26.7%     | 6.0%  |                              |                       |
|                    |                                                    | During | 0.43±0.67 | 67.4%                   | 22.4%     | 10.1% |                              |                       |
| Q7                 | I found it hard to think properly or concentrate   | Before | 0.53±0.58 | 51.1%                   | 44.4%     | 4.5%  |                              |                       |
|                    |                                                    | During | 0.77±0.74 | 40.9%                   | 40.8%     | 18.3% |                              |                       |
| Q8                 | I hated myself                                     | Before | 0.23±0.49 | 79.8%                   | 17.0%     | 3.2%  |                              |                       |
|                    |                                                    | During | 0.32±0.6  | 75.1%                   | 17.9%     | 7.1%  |                              |                       |
| Q9                 | I was a bad person                                 | Before | 0.15±0.39 | 85.6%                   | 13.4%     | 1.1%  |                              |                       |
|                    |                                                    | During | 0.17±0.44 | 86.0%                   | 11.3%     | 2.8%  |                              |                       |
| Q10                | I felt lonely                                      | Before | 0.39±0.58 | 66.2%                   | 29.0%     | 4.8%  |                              |                       |
|                    |                                                    | During | 0.59±0.73 | 55.6%                   | 30.1%     | 14.3% |                              |                       |
| Q11                | I thought nobody really loved me                   | Before | 0.26±0.52 | 77.6%                   | 18.7%     | 3.7%  |                              |                       |
|                    |                                                    | During | 0.29±0.57 | 76.9%                   | 17.4%     | 5.7%  |                              |                       |
| Q12                | I thought I could never be as good as other people | Before | 0.23±0.49 | 80.4%                   | 16.4%     | 3.2%  |                              |                       |
|                    |                                                    | During | 0.26±0.54 | 78.6%                   | 16.3%     | 5.1%  |                              |                       |
| Q13                | I did everything wrong                             | Before | 0.27±0.49 | 74.7%                   | 23.3%     | 2.0%  |                              |                       |
|                    |                                                    | During | 0.27±0.49 | 75.1%                   | 22.6%     | 2.3%  |                              |                       |
| Total Score        |                                                    | Before | 4.49±4.41 | N/A                     |           |       | 7.4%                         | 92.6%                 |
|                    |                                                    | During | 6.5±5.63  |                         |           |       | 17.5%                        | 82.5%                 |
